# Supplementary material for: Prevalence of Pathogenic Leptospira spp. in Non-Volant Small Mammals of Hutan Lipur Sekayu, Terengganu, Malaysia
Source: MDPI journal article supplement (doi:10.3390/pathogens11111300), 2022-11-05
Supplement: s1 [file s1]

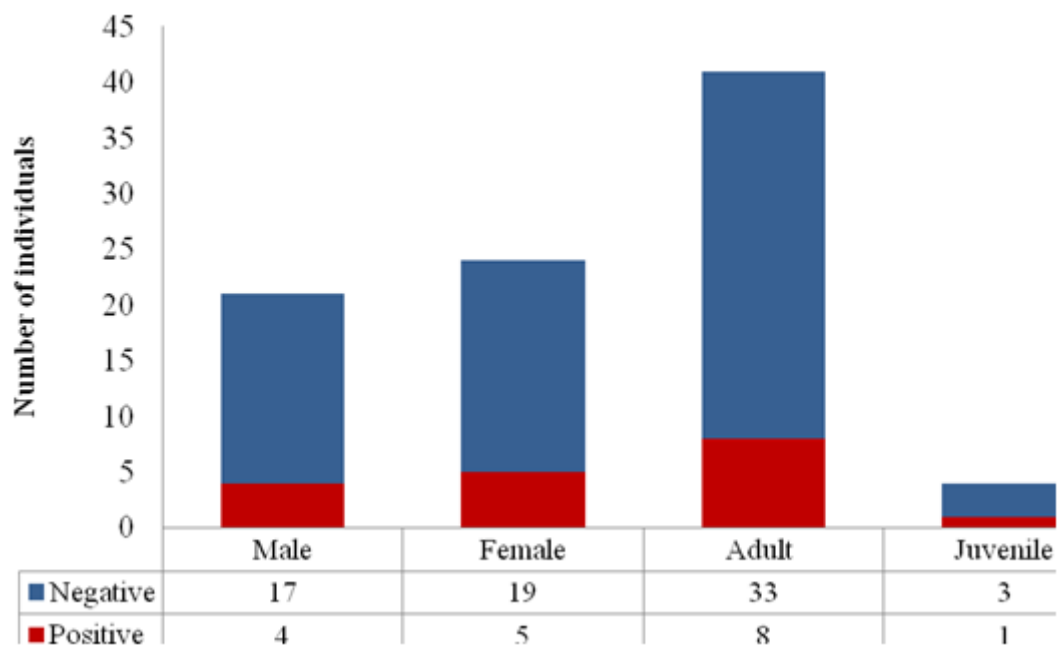

**Supplementary material S1.** Positive pathogenic *Leptospira* sp. infestation rate according to gender and age.
